# Supplementary material for: Radiologists’ Knowledge and Attitudes towards CT Radiation Dose and Exposure in Saudi Arabia—A Survey Study
Source: PubMed Central journal article supplement (PMC7563332; doi:10.3390/medsci8030027), 2020-07-20
Supplement: medsci-08-00027-s001.pdf [file medsci-08-00027-s001.pdf]

# Supplementary

## RADIOLOGISTS' KNOWLEDGE AND ATTITUDES TOWARDS CT RADIATION DOSE AND EXPOSURE IN SAUDI ARABIA

Would be very grateful if you could participate. This involves the completion of the survey. Ethical exemption has already been applied for and obtained from your responses will be treated strictly in confidence and information provided will not be made available to any individual or organization.

### **Section A: Background Information:**

**Choose the most appropriate answer from the given options:**

**1. What is your highest academic qualification:**

1. MBBS
2. Diploma
3. Master
4. PhD or other training certificates (i.e. Board, MD)

**1. How many years of your CT experience:**

1. Less than 1 year
2. 1-5 years
3. 6-10 years
4. 11-20 years
5. More than 20 years

**2. Place of work:**

1. Ministry of Health Hospitals
2. Universities' Hospitals
3. National Guard Hospitals
4. Military Hospitals
5. Security Forces Hospitals
6. John Hopkins/Aramco Hospital
7. Private Hospitals
8. Others (specify):

**3. How often do you participate in training and education on paediatric CT radiation risk:**

1. Monthly
2. Once in 3 months
3. Once in 6 months
4. Once in year
5. Never

**4. What activities do you participate in:**

1. In-house training (on job training)
2. Workshop, seminars and conference
3. Self-directed study (i.e. regular reading of journals, book etc.)
4. Accredited courses conducted by professional associations
5. Postgraduate awards courses conducted by universities
6. Others (specify):

## **Section B: CT protocols information:**

*choose the most appropriate answer from the given options:*

**P1. Are you familiar with ALARA (as low as reasonably achievable) principle:**

- Agree
- Disagree

**P2. Are the CT scan protocols updated anytime when need?**

- Agree
- Disagree

**P3. Are you confidence to alter the CT parameters correctly, considering image quality and radiation dose:**

- Agree
- Disagree

**P4. Knowledge and confident regarding the correct modulation of the CT parameters**

2.1 Reducing the kVp from 120 to 100 kVp for angiographic CT procedures (all other parameters being kept constant): *Depends in the previous sentence choose Agree or Disagree*

A. Reduces the radiation dose:

- Agree
- Disagree

B. Increases the image noise:

- Agree

*Disagree*

C. Increases the vessel enhancement:

*Agree*

*Disagree*

2.2 Decreasing the gantry rotation time (in seconds) :

Depends in the previous sentence choose between Agree and Disagree

A. Decrease the patient dose in a linear fashion:

*Agree*

*Disagree*

B. Increases the image noise:

*Agree*

*Disagree*

**P5. Do you consider alternative medical imaging investigation other than CT in your department:**

Agree

Disagree

**P6. Does your organisation have a policy to explain to the parent or carer about the impact of CT radiation on the paediatric patients:**

Agree

Disagree

**P7. Does the discussion with parents or carers involve explanation about radiation dose:**

Agree

Disagree

Sometimes

## Section C: Radiation Dose and Radiation risk

**R1. Do you believe that the risk for cancer to the patient is increased as a result of a CT scan:**

Agree

Disagree

**R2. Rate your understanding of the risk of cancer to the patient that results from a CT scan:**

Low

High

**R3. How do you rate the risk to the patients of the CT radiation in pediatrics examination of the head:**

Low

High

**R4. How do you rate the risk to the patients of the CT radiation in pediatric examination of the chest:**

Low

High

**R5. How do you rate the risk to the patients of the CT radiation in pediatrics examination of the abdomen:**

Low

High

**D1. Do you think the radiation dose for a head CT scan in your department is:**

Low

High

**D2. Do you think the radiation dose for a chest CT scan in your department is:**

Low

High

**D3. Do you think the radiation dose for an Abdomen/Pelvis CT scan in your department is:**

Low

High

**Additional comments:**
